# Supplementary material for: Gene Isoform Specificity through Enhancer-Associated Antisense Transcription
Source: PLOS journal article supplement (doi:10.1371/journal.pone.0043511), 2012-08-24
Supplement: S16 (10.1371/journal.pone.0043511.s016) [file journal.pone.0043511.s016]

**Table S1. RNA-Seq mapping statistics.**

| Sample                   | Barcode | Count     | Filtered | Mapped | Unique |
|--------------------------|---------|-----------|----------|--------|--------|
| rna-46C-UN-CYT-PA-P1-10  | B01     | 10892931  | 84.6     | 35.9   | 25.5   |
| rna-46C-UN-CYT-PA-P1-60  | B03     | 15035117  | 84.3     | 24.2   | 18.0   |
| rna-46C-UN-CYT-PA-R3-10  | B04     | 13066238  | 89.7     | 47.4   | 34.7   |
| rna-46C-UN-NUC-PA-P1-60  | B06     | 28325017  | 93.9     | 24.0   | 20.4   |
| rna-46C-UN-NUC-PA-R3-10  | B07     | 14738890  | 94.7     | 45.3   | 38.6   |
| rna-46C-D5-CYT-PA-P1-10  | B08     | 11224434  | 86.7     | 39.6   | 30.2   |
| rna-46C-D5-CYT-PA-P1-60  | B09     | 17000168  | 87.5     | 25.0   | 19.7   |
| rna-46C-D5-CYT-PA-R3-10  | B10     | 21650624  | 91.6     | 48.3   | 37.7   |
| rna-46C-D5-NUC-PA-P1-10  | B11     | 15663022  | 94.1     | 47.1   | 42.3   |
| rna-46C-D5-NUC-PA-P1-60  | B12     | 24108732  | 94.6     | 34.7   | 31.2   |
| rna-46C-D5-NUC-PA-R3-10  | B13     | 15223650  | 81.5     | 40.2   | 37.3   |
| rna-KH2-UN-NUC-RM-R3-10  | B14     | 12475012  | 84.9     | 36.2   | 32.3   |
| rna-KH2-D5-NUC-RM-R3-10  | B15     | 14433434  | 96.4     | 53.1   | 48.0   |
| Onodera Project-Specific | B01-B13 | 186928823 | 90.2     | 36.5   | 30.1   |
| Total                    | all     | 213837269 | 90.3     | 37.6   | 31.4   |

Mapping statistics for reads from RNA-Seq experiment. Sample, RNA library information; Barcode, barcode used for sequencing; Count, total number of reads returned; Filtered, percent of reads passing filter step; Mapped, percent of reads mapped singly or multiply; Unique, percent of reads mapped uniquely. Barcodes B14-B15 were part of a separate project and were not used in this study, but are presented here for completeness of run information. “UN” indicates our undifferentiated mESC libraries, while “D5” indicates our day 5 neural precursor libraries.
