# Supplementary material for: Gene Isoform Specificity through Enhancer-Associated Antisense Transcription
Source: PLOS journal article supplement (doi:10.1371/journal.pone.0043511), 2012-08-24
Supplement: S17 (10.1371/journal.pone.0043511.s017) [file journal.pone.0043511.s017]

**Table S2. Bad joins of UCSC Known Genes in Cufflinks and merged Cufflinks output.**

| RNA Type | Cufflinks bad joins | Merged Cufflinks bad joins |      |
|----------|---------------------|----------------------------|------|
|          |                     | d10                        | d5   |
| UnNuc    | 54                  | 3186                       | 3365 |
| UnCyt    | 55                  | 1980                       | 1669 |
| NPNuc    | 73                  | 3661                       | 3828 |
| NPCyt    | 83                  | 2021                       | 1672 |

“Bad joins” occur when two separate genes are merged into a single transcript. Cufflinks bad joins, bad joins by Cufflinks; d10, bad joins when an RPKM percentile difference of 10 is allowed for merging Cufflinks output; d5, bad joins when an RPKM percentile difference of 5 is allowed for merging Cufflinks output.
